# Supplementary material for: Subtype-specific secretomic characterization of pulmonary neuroendocrine tumor cells
Source: PubMed Central journal article supplement (PMC6642156; doi:10.1038/s41467-019-11153-5), 2019-07-19
Supplement: 41467_2019_11153_MOESM1_ESM.pdf [file 41467_2019_11153_MOESM1_ESM.pdf]

Supplementary Information

**Subtype-Specific Secretomic Characterization of Pulmonary Neuroendocrine Tumors**

Wang et al.

This PDF file includes:

Supplementary Figures 1-6

Supplementary Tables 1-3

Supplementary References

## Supplementary Figures and Figure Legends

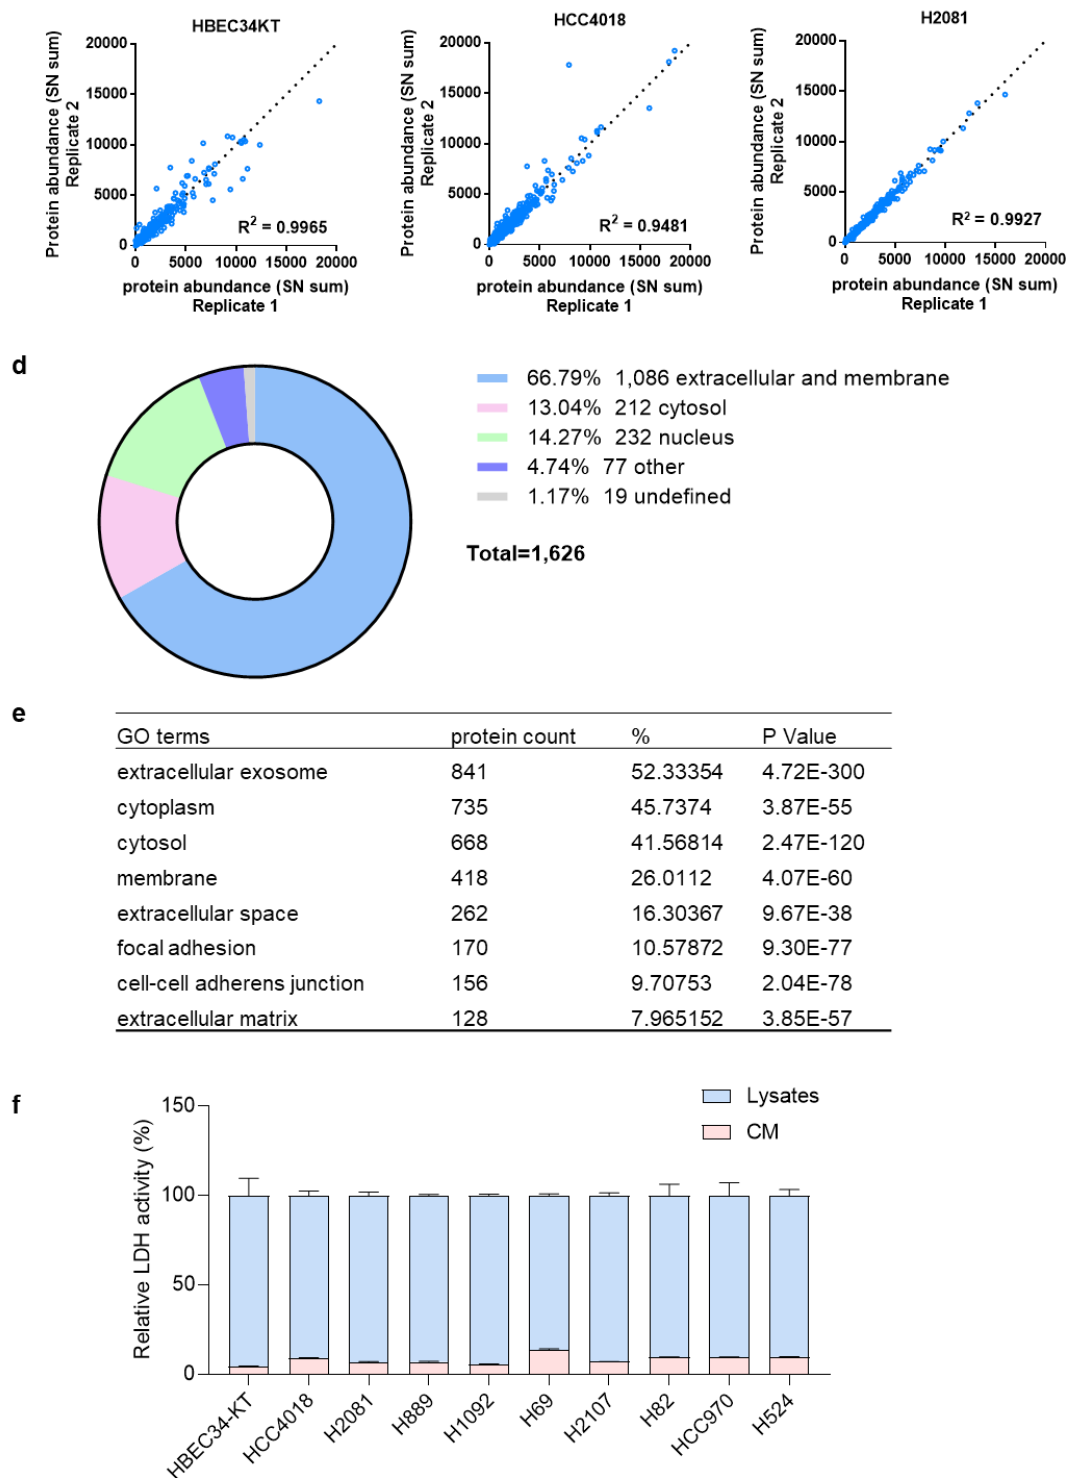

Supplementary Figure. 1, related to Figure. 1 Quantitative mass spectrometric analysis of the NE lung cancer secretome

**a-c** Reproducibility of the TMT experiments. Two biological replicate experiments were performed for HBEC34-KT (**a**), HCC4018 (**b**) and H2081 (**c**). **d** The exclusive protein

counts for each highly represented GO cellular component term. **e** Summary table for each highly represented GO cellular component term. **f** Summary metrics for the LDH activity assay of the CM (pink) and lysates (light blue) of the indicated cells starved in FBS free medium for 24 hours.

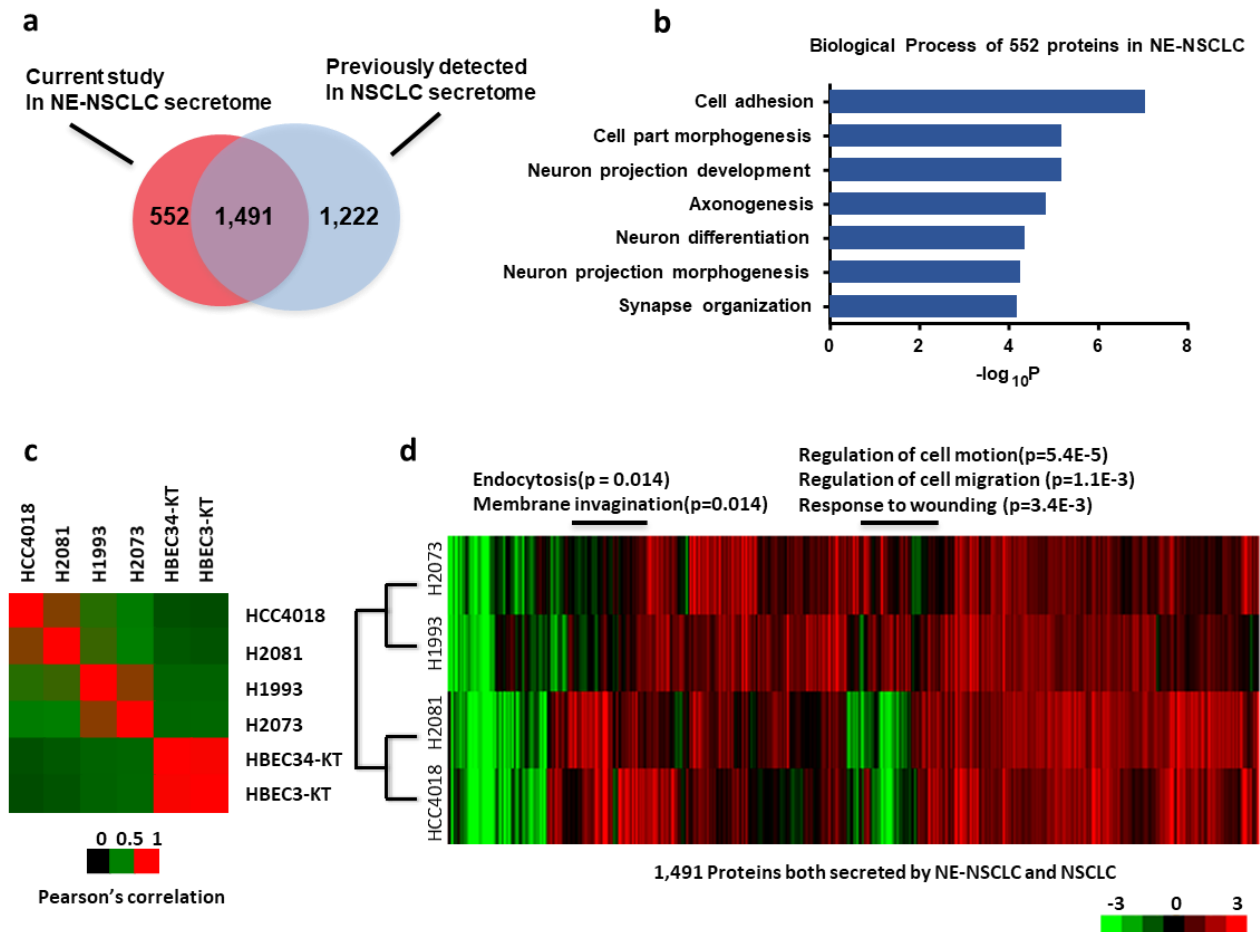

Supplementary Figure. 2, related to Figure. 2 Comparison of the secretome between high-grade NE NSCLC and classic NSCLC

**a** Venn diagram showing the proteins that were commonly identified in the CM from NE-lung cancer (current study) vs. NSCLC<sup>1</sup>. **b** Gene Ontology (Biological Process) analysis of the 552 proteins that were uniquely identified in the CM from NE-lung cancer. **c** Pearson's correlation (based on protein expression) of the 1,491 proteins that were commonly identified in all six cell lines (HBEC3-KT, HBEC34-KT, H1993, H2073, HCC4018 and H2081). **d** Unsupervised hierarchical clustering analysis of protein

expression in the CM from the NSCLC and NE-lung cancer lines (normalized to HBEC cells, shown as log<sub>2</sub>-transformed ratios). Representative proteins that were differentially expressed present in NSCLC or NE-lung cancer cell lines were subjected to GO analysis.

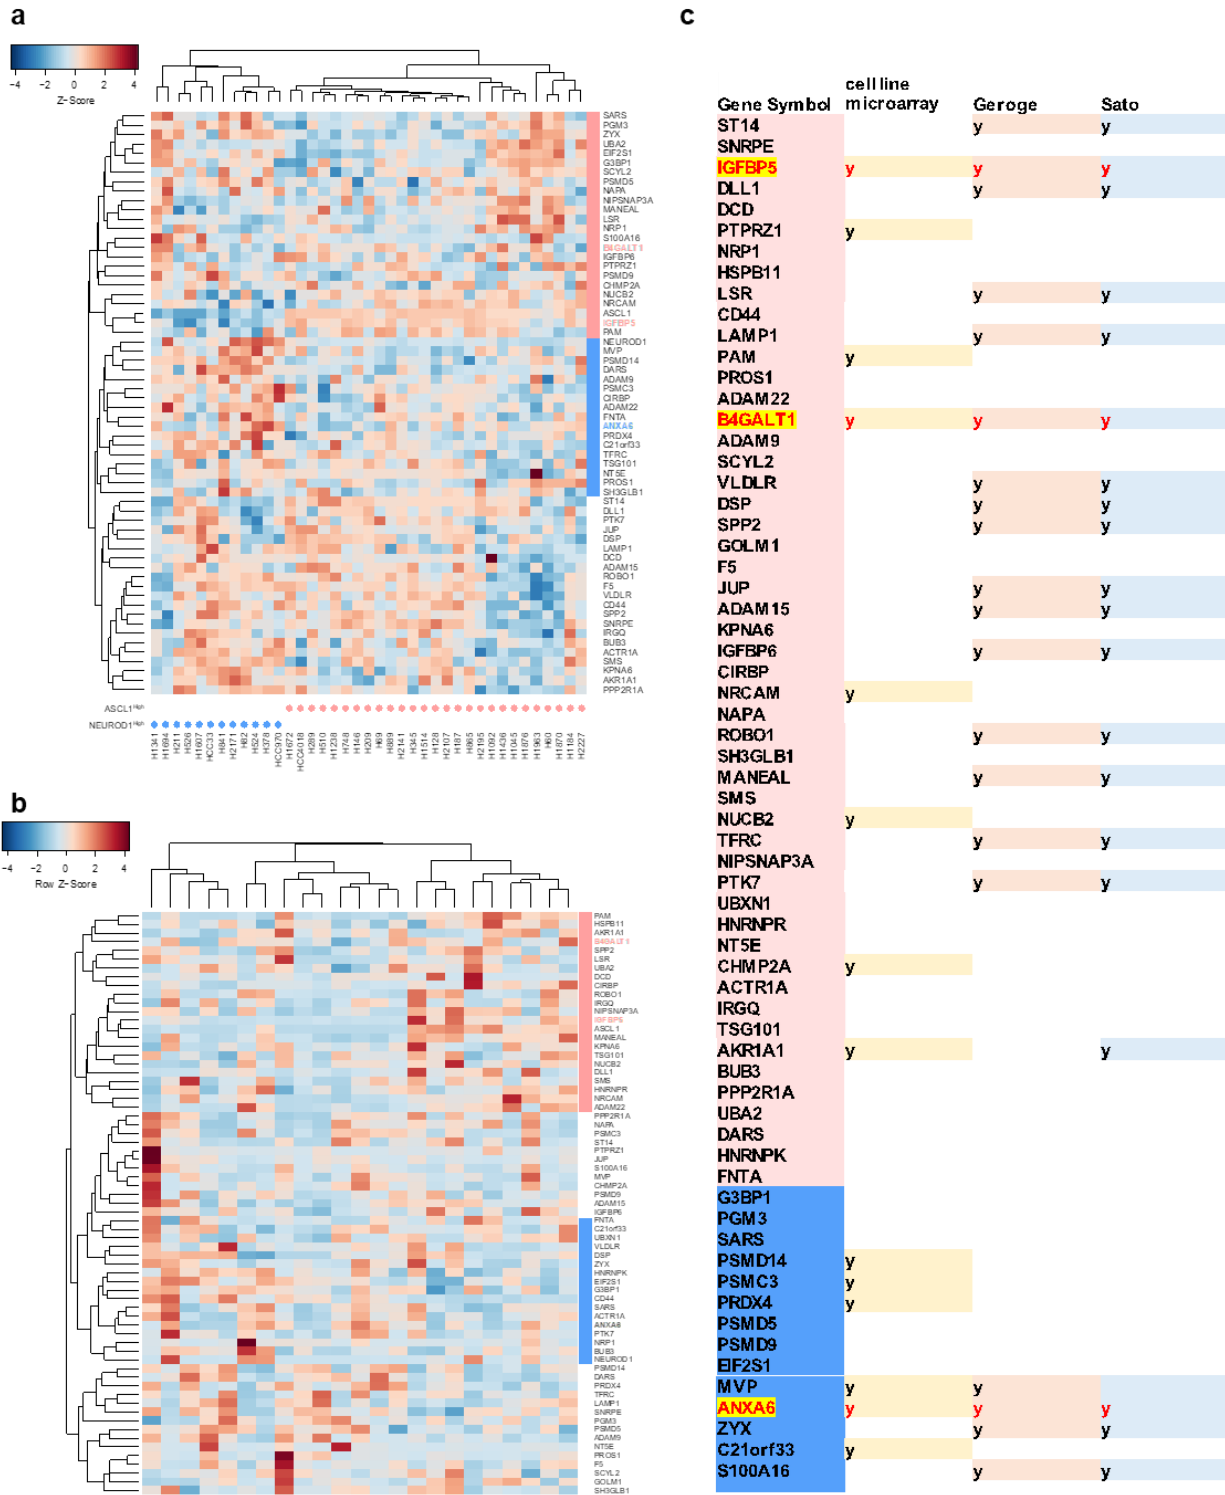

Supplementary Figure. 3, related to Figure. 3 Generation of an LCSS for the ASCL1<sup>High</sup> and NEUROD1<sup>High</sup> NE-Lung cancer subtypes

**a** Transcriptomic clustering of genome wide microarray dataset in 39 NE-lung cancer cell lines<sup>2</sup> based on the AS/ND-LCSS gene expression markers. Pink dots indicate the ASCL1<sup>High</sup> cells, and blue dots indicate the NEUROD1<sup>High</sup> lines. **b** Transcriptomic clustering of genome wide microarray dataset in 23 SCLC patient sample cohort<sup>3</sup> based on the AS/ND-LCSS gene expression markers (the pink bar indicates the AS-LCSS genes that are clustered with ASCL1 whereas the blue bar indicates the ND-LCSS genes that are clustered with NEUROD1). **c** Summary table of the comprehensive transcriptome analysis. Y, the gene was clustered together with the corresponding transcription factor. N, not clustered with the corresponding transcription factor.

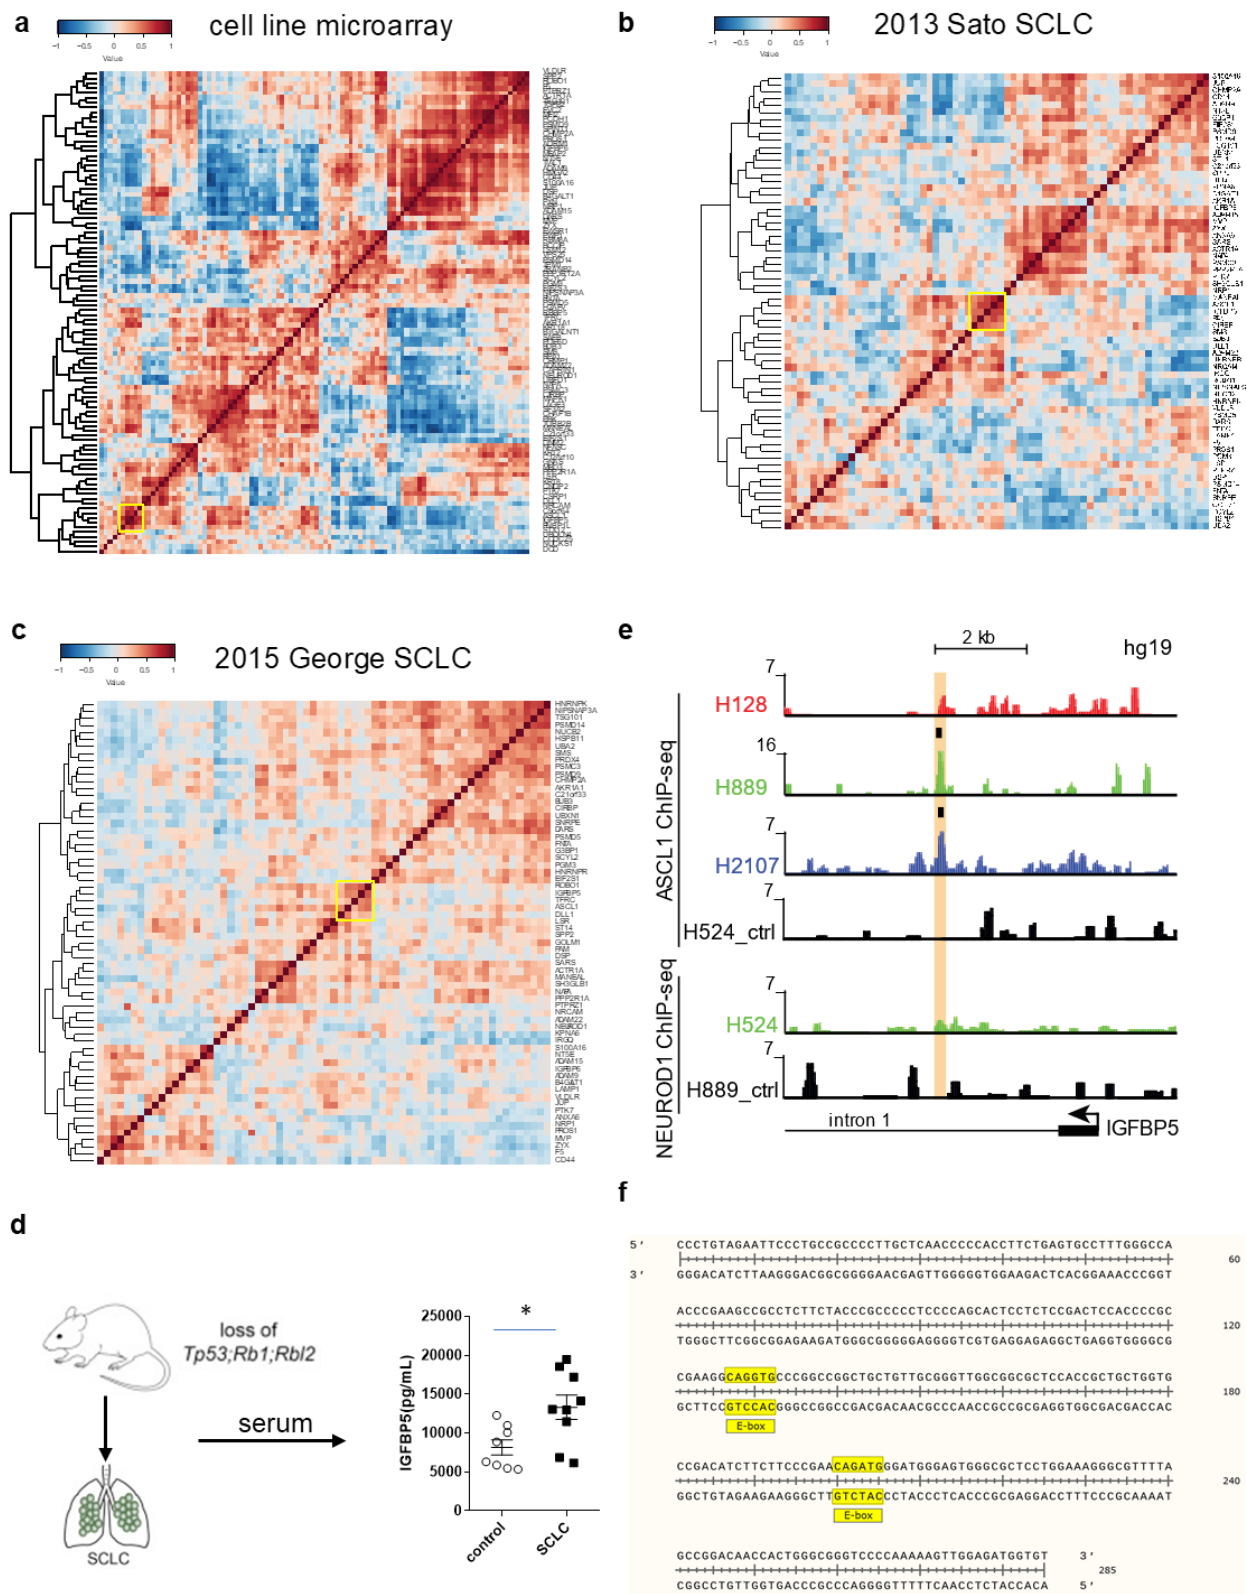

Supplementary Figure. 4, related to Figure. 4 Identification of IGFBP5 as a direct transcriptional target of ASCL1

**a-c** Correlation heatmap illustrating co-expression patterns of AS/ND-LCSS genes and ASCL1/NEUROD1. Data were extracted from three independent SCLC transcriptomic datasets as indicated. **d** ELISA analyses of IGFBP5 levels in the serum from the control and TCKO SCLC mice (n = 8-9). Unpaired two-tailed t-test. \* $P < 0.05$ . **e** and **f** IGFBP5 is a transcriptional target of ASCL1. **e** Genome browser tracks from the human hg19 assembly showing the ASCL1 binding sites by ChIP-seq analyses in ASCL1<sup>High</sup> SCLC cells (H128, H889, and H2107) and a control NEUROD1<sup>High</sup> cell line (H524). The lower panel indicates the NEUROD1 binding sites in the genome of a NEUROD1<sup>High</sup> SCLC cell (H524) and a control ASCL1<sup>High</sup> cell line (H889). The P5 region (from +3.2 kb to +3.5 kb) is shown, which is located in the first intron of the *IGFBP5* gene (P5 genomic coordinates are 216692338-216692054 (GRCh38.p12 Primary Assembly)). The black ticks above the tracks indicate that significant enrichment at these peaks was detected. ChIP-seq data (GEO: GSE69398) are from Borromeo et al., 2016. **f** DNA sequences of IGFBP5-P5-Luc where the E-box motifs are highlighted in yellow.

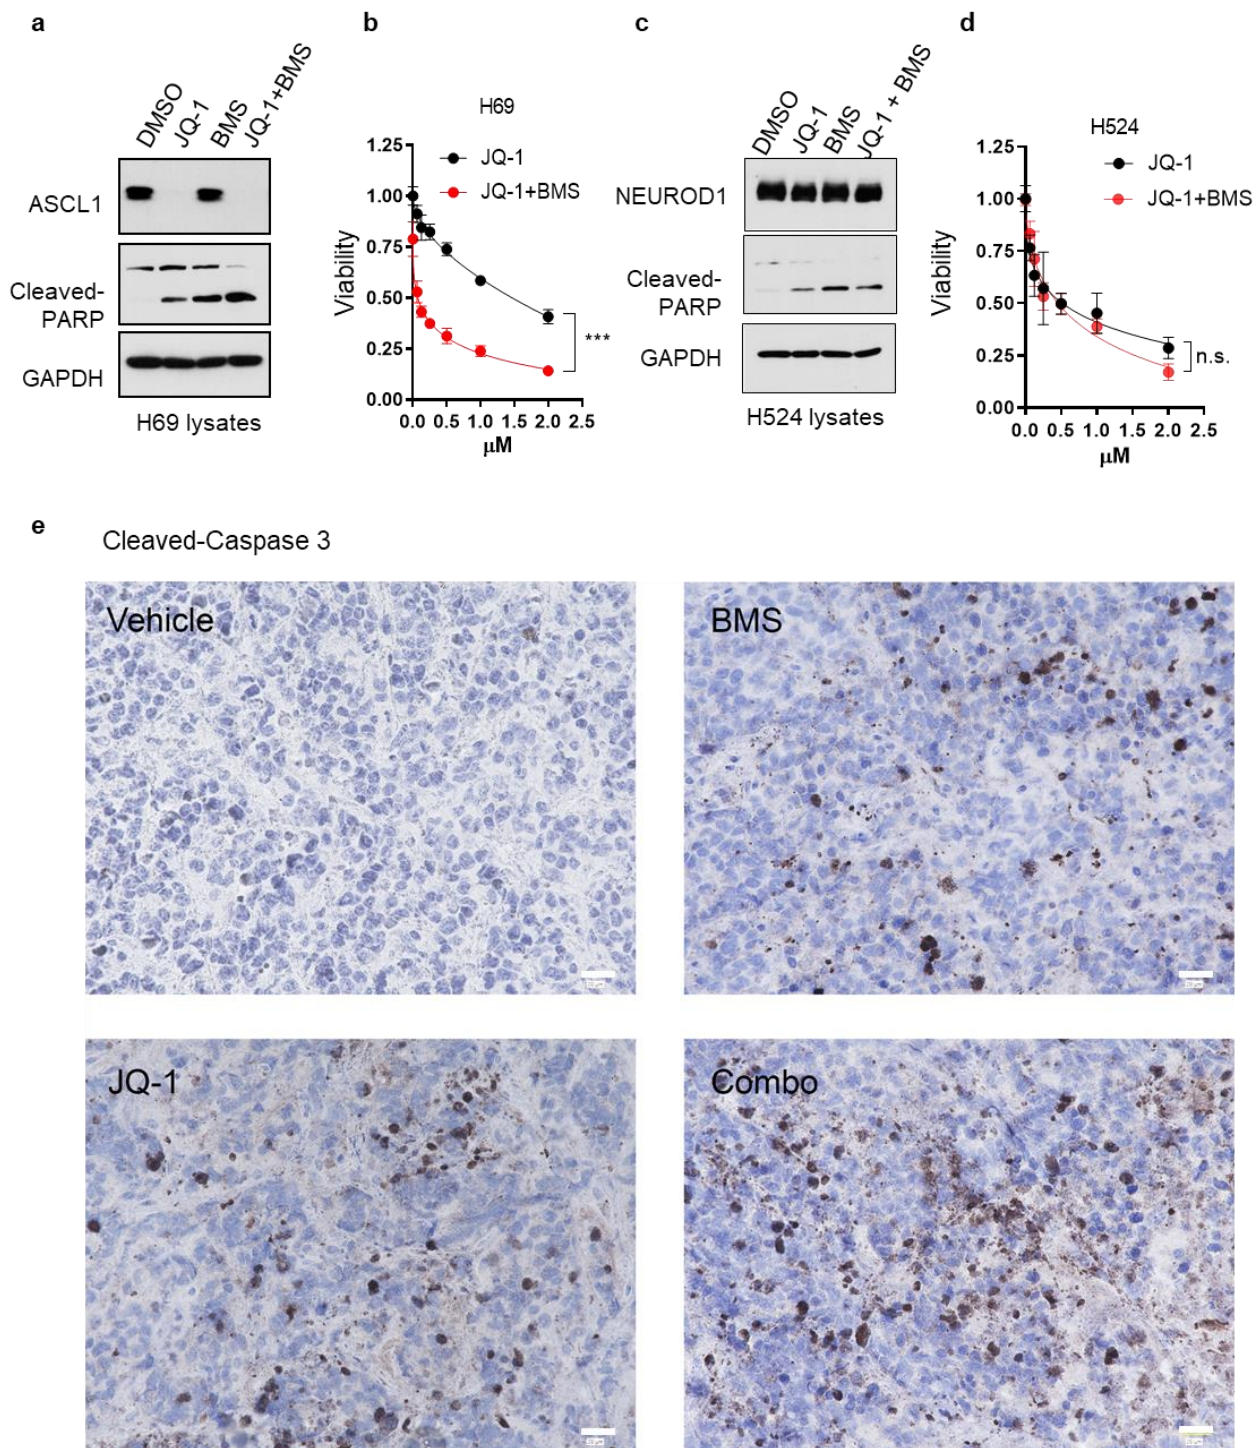

Supplementary Figure. 5, related to Figure. 5 JQ-1 treatment sensitizes ASCL1<sup>High</sup> SCLC cells to IGF-1R inhibitors.

**a, c** Immunoblotting experiments of H69 cells (ASCL1<sup>High</sup>) (**a**) and H524 cells (NEUROD1<sup>High</sup>) (**c**) treated with DMSO, JQ-1 (1 μM), BMS-754807 (1 μM) and JQ-1 + BMS-754807 (1 μM each) for 48 hours. **b, d** Cell viability of H69 cells (n = 4) (**b**) and H524 cells (n = 4) (**d**) treated with JQ-1 or JQ-1+BMS-754807 at the indicated



concentrations for 72 hours. Unpaired two-tailed *t*-test. \*\*\*  $P < 0.001$  **e** JQ-1+BMS-754807 combination treatment resulted in enhanced cell apoptosis in H2081 xenograft tumors. Representative images of Immunohistochemistry (IHC) (cleaved-caspase 3) analysis of H2081 xenograft tumor tissues. Bar 20  $\mu\text{m}$ .

Fig. 4b

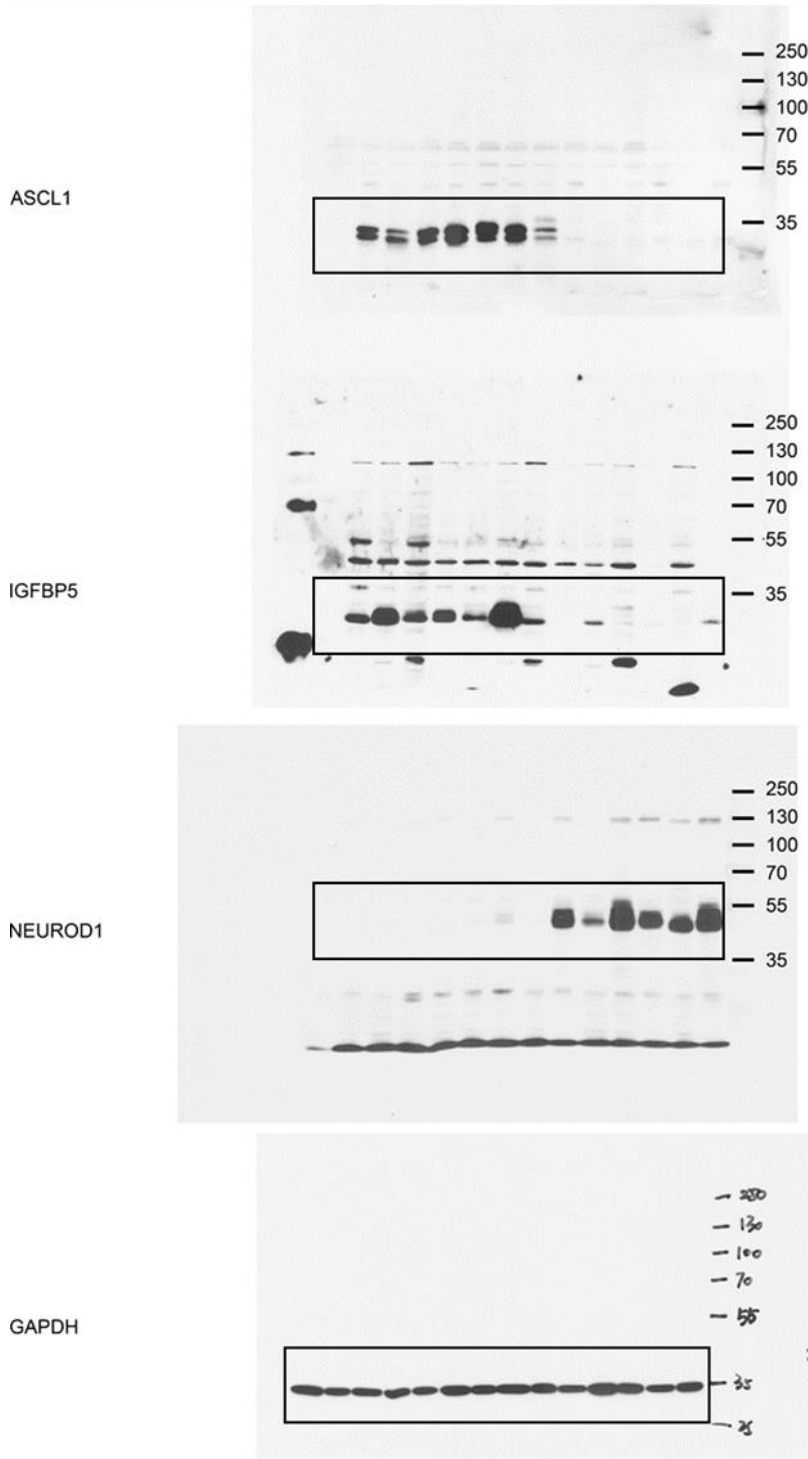

Fig. 4c

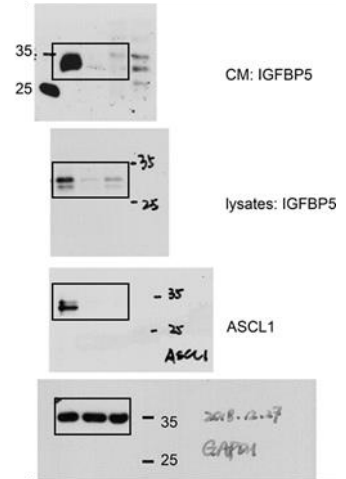

Fig. 4e

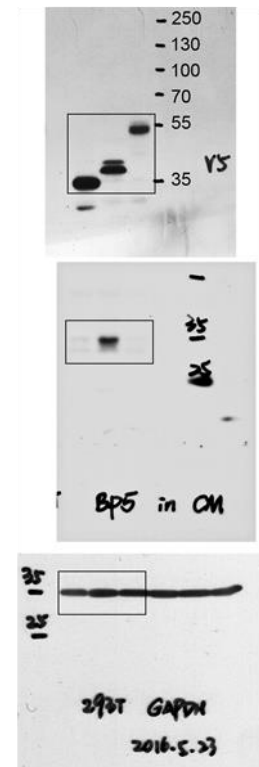

Supplementary Figure. 6. Fully uncropped versions of all gels and blots.

Fig. 5a

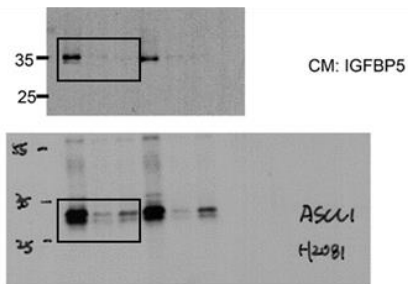

Fig. 5b

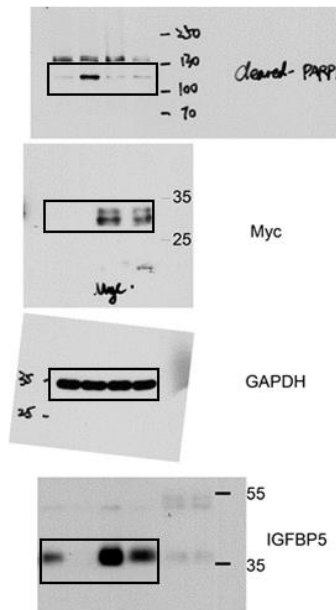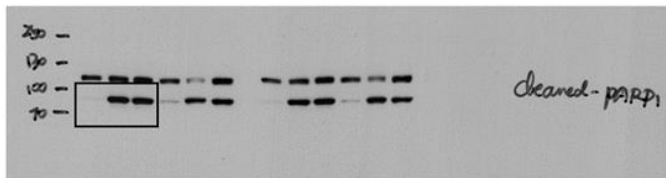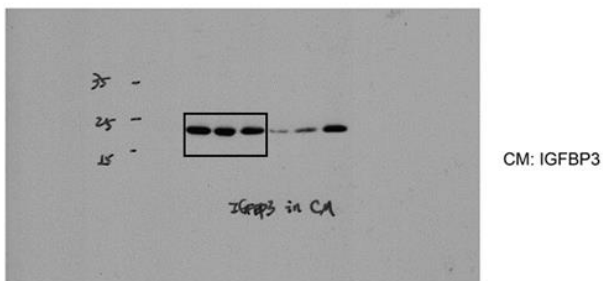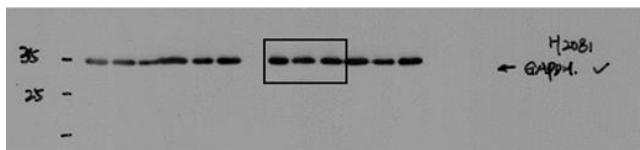

Fig. 5c

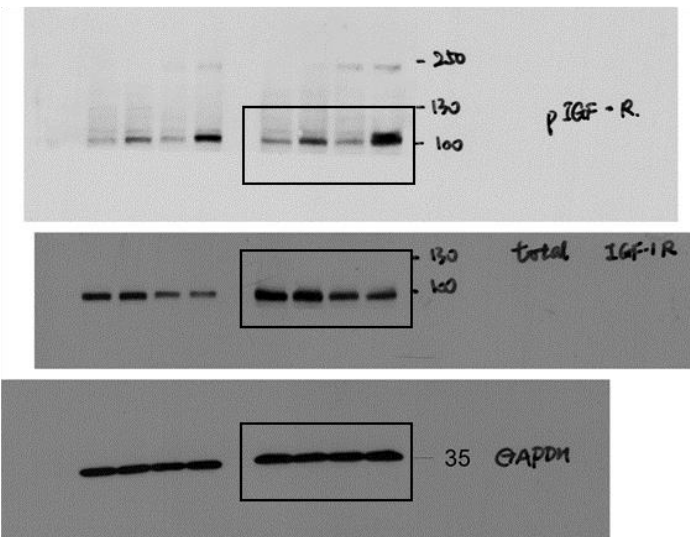

Fig. 5d

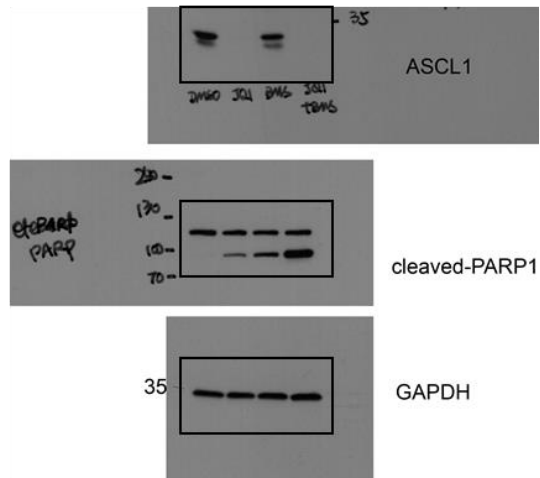

Supplementary Figure. 6 (continued). Fully uncropped versions of all gels and blots.

Supplementary Fig. 5a

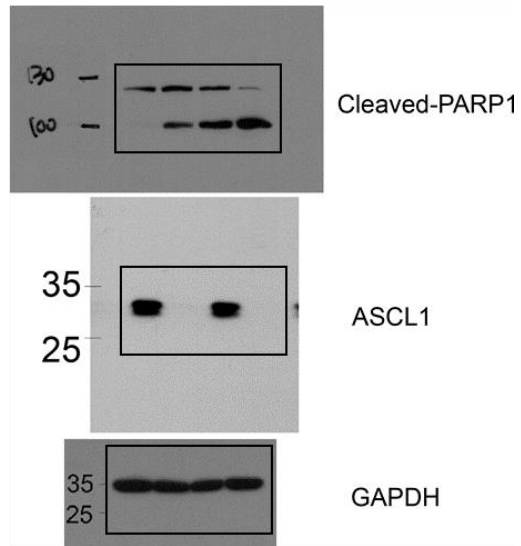

Supplementary Fig. 5c

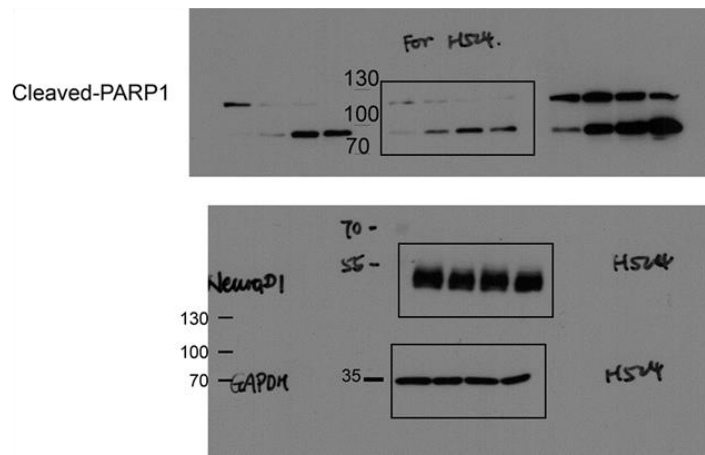

Supplementary Figure. 6 (continued). Fully uncropped versions of all gels and blots.

### Supplementary Table. 1

The Pearson correlation coefficient for the correlation analysis between the secretome of NSCLC and NE-lung cancers.

|               | HBEC34-<br>KT | HCC4018  | H2081    | HBEK3-<br>KT | H1993    | H2073    |
|---------------|---------------|----------|----------|--------------|----------|----------|
| HBEC34-<br>KT | 1             | 0.311013 | 0.345129 | 0.988494     | 0.390833 | 0.398687 |
| HCC4018       | 0.311013      | 1        | 0.749287 | 0.293786     | 0.58423  | 0.491554 |
| H2081         | 0.345129      | 0.749287 | 1        | 0.32681      | 0.623733 | 0.504776 |
| HBEK3-<br>KT  | 0.988494      | 0.293786 | 0.32681  | 1            | 0.383709 | 0.402679 |
| H1993         | 0.390833      | 0.58423  | 0.623733 | 0.383709     | 1        | 0.767335 |
| H2073         | 0.398687      | 0.491554 | 0.504776 | 0.402679     | 0.767335 | 1        |

## Supplementary Table. 2

### DNA sequences for ASCL1 shRNAs and Lentiviral vectors.

|                                                                                                                                                                                                                                  |                               |
|----------------------------------------------------------------------------------------------------------------------------------------------------------------------------------------------------------------------------------|-------------------------------|
| <b>TRCN0000013550</b>                                                                                                                                                                                                            | shASCL1#1                     |
| Region:CDS                                                                                                                                                                                                                       | Clone ID:NM_004316.1-1023s1c1 |
| Sequence:CCGGCAACTACTCCAACGACTTGA ACTCGAGTTCAAGTCGTTGGAGT<br>AGTTGTTTTT                                                                                                                                                          |                               |
| <b>TRCN0000244309</b>                                                                                                                                                                                                            | shASCL1#2                     |
| Region:CDS                                                                                                                                                                                                                       | Clone ID:NM_004316.3-955s21c1 |
| Sequence:CCGGCAACCGCGTCAAGTTGGTCAACTCGAGTTGACCAACTTGACG<br>CGGTTGTTTTTG                                                                                                                                                          |                               |
| <b>Lentiviral Gateway® destination vector for expression of a C-terminally V5-tagged protein.</b>                                                                                                                                |                               |
| pLenti6.3 V5-DEST                                                                                                                                                                                                                |                               |
| Sequence:<br><a href="https://www.snapgene.com/local/fetch.php?set=gateway_cloning_vectors&amp;plasmid=pLenti6.3_V5-DEST">https://www.snapgene.com/local/fetch.php?set=gateway_cloning_vectors&amp;plasmid=pLenti6.3_V5-DEST</a> |                               |
| <b>Lentiviral plasmid (<math>\Delta</math>8.9)</b>                                                                                                                                                                               |                               |
| Sequence: <a href="https://www.addgene.org/browse/sequence_vdb/2221/">https://www.addgene.org/browse/sequence_vdb/2221/</a>                                                                                                      |                               |
| <b>Lentiviral plasmid (VSVG)</b>                                                                                                                                                                                                 |                               |
| Sequence: <a href="https://www.addgene.org/8454/sequences/">https://www.addgene.org/8454/sequences/</a>                                                                                                                          |                               |

### Supplementary Table 3

#### Primers.

| <b>Primers for Luciferase Constructs</b> |                                     |         |
|------------------------------------------|-------------------------------------|---------|
|                                          | <b>Sequence (5'-&gt;3')</b>         |         |
| pGL4-P1-Luc                              | TATGGTACCTCTCCAGACTTTTAGGGGAGAAATTC | forward |
|                                          | TATCTCGAGCCAGTTTGTAGCTGCAATTTGAGC   | reverse |
| pGL4-P2-Luc                              | TATGGTACCATTGATTTGTTCTACCTTACCAAGC  | forward |
|                                          | TATCTCGAGCCAGTTTGTAGCTGCAATTTGAGC   | reverse |
| pGL4-P3-Luc                              | TATGGTACCGTTTTCCACCCTTCTCCGGAC      | forward |
|                                          | TATCTCGAGTCCTTGACCAGCTCGCAGCCCA     | reverse |
| pGL4-P4-Luc                              | TATGGTACCCTTCATCTTGGGGGATGTGGATTT   | forward |
|                                          | TATCTCGAGGGATCTTGCTTGGGACTGAAGTGT   | reverse |
| pGL4-P5-Luc                              | TATGGTACCCCCTGTAGAATTCCCTGCCG       | reverse |
|                                          | TATCTCGAGACACCATCTCCAACCTTTTTGGG    | forward |
| pGL4-P6-Luc                              | TATGGTACCCTTTGGCAAACACTGCCAGAT      | reverse |
|                                          | TATCTCGAGTGAGACACATCTGCCTATGAAAG    | forward |
| pGL4-P7-Luc                              | TATGGTACCTCTTTCAGCAGGAGAGGAGAGA     | reverse |
|                                          | TATCTCGAGTGTTTCAATTGGAAGTGCTGTTCT   | forward |
| pGL4-P8-Luc                              | TATGGTACCTAGCCTTTGAAATCCGGTGT       | reverse |
|                                          | TATCTCGAGGGAAGGGGGAGCATGCTTAG       | reverse |
| pGL4-P9-Luc                              | TATGGTACCTTCCTATGTGTACAGTTATCG      | forward |
|                                          | TATCTCGAGATCTGAGGCTCCTTGGACT        | reverse |
| pGL4-P10-Luc                             | TATGGTACCTGCAGCCTCCAACCTCCT         | forward |
|                                          | TATCTCGAGTCCCTTGCCAACCCTA           | reverse |
| pGL4-P5-Luc-Del1                         | CCGCCGAAGGCCCGGCCGGC                | forward |
|                                          | GCCGGCCGGGCCTTCGGCGG                | reverse |

|                                  |                                                     |         |
|----------------------------------|-----------------------------------------------------|---------|
| pGL4-P5-Luc-Del2                 | CGACATCTTCTTCCCGAAGGATGGGAGTGGGC                    | forward |
|                                  | GCCCACTCCCATCCTTCGGGAAGAAGATGTCTG                   | reverse |
| <b>Primers for real time PCR</b> |                                                     |         |
| RT-hIGFBP5                       | GTGCTGTGTACCTGCCCAAT                                | forward |
|                                  | CGTCAACGTACTIONCCATGCCT                             | reverse |
| <b>Other Primers</b>             |                                                     |         |
| pLenti-ASCL1-V5                  | GGGGACAAGTTTGTACAAAAAAGCAGGCTATGGAAAGCTCTGCCAAGAT   | forward |
| pLenti-ASCL1-V5                  | GGGGACCACTTTGTACAAGAAAGCTGGGTCGAACCAGTTGGTGAAGTCGA  | reverse |
| pLenti-NEUROD1-V5                | GGGGACAAGTTTGTACAAAAAAGCAGGCTATGACCAAATCGTACAGCGA   | forward |
| pLenti-NEUROD1-V5                | GGGGACCACTTTGTACAAGAAAGCTGGGTCATCATGA AATATGGCATTGA | reverse |

### Supplementary References

1. Hu R, Huffman KE, Chu M, Zhang Y, Minna JD, Yu Y. Quantitative Secretomic Analysis Identifies Extracellular Protein Factors That Modulate the Metastatic Phenotype of Non-Small Cell Lung Cancer. *J Proteome Res* **15**, 477-486 (2016).
2. Augustyn A, et al. ASCL1 is a lineage oncogene providing therapeutic targets for high-grade neuroendocrine lung cancers. *Proc Natl Acad Sci U S A* **111**, 14788-14793 (2014).



3. Sato T, *et al.* PRC2 overexpression and PRC2-target gene repression relating to poorer prognosis in small cell lung cancer. *Scientific reports* **3**, 1911 (2013).
